# Supplementary material
Source: MDPI journal article supplement (https://www.mdpi.com/2077-1312/7/12/426)
Supplement: s1 [file s1]

# Effects of the Bioturbating Marine Yabby *Trypaea australiensis* on Sediment Properties in Sandy Sediments Receiving Mangrove Leaf Litter

Ryan J. K. Dunn <sup>1,\*</sup>, David T. Welsh <sup>2</sup>, Peter R. Teasdale <sup>3</sup>, Franck Gilbert <sup>4</sup>, Jean-Christophe Poggiale <sup>5</sup> and Nathan J. Waltham <sup>6</sup>

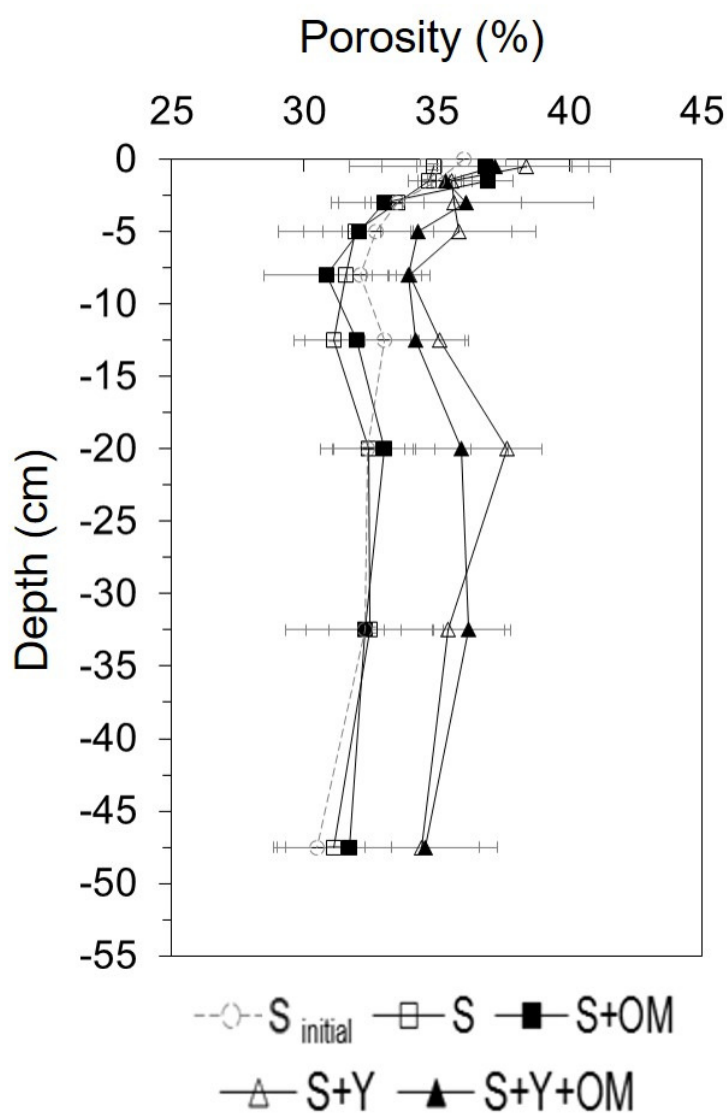

Figure S1: Profiles (mean  $\pm$  standard deviation) of sediment porosity in each mesocosm treatment: control-sediment only (S), sediment + yabbies (S+Y), sediment + leaf litter (organic matter; S+OM) and sediment + yabbies + leaf litter (S+Y+OM) treatments, and initial sediment conditions ( $S_{initial}$ ).

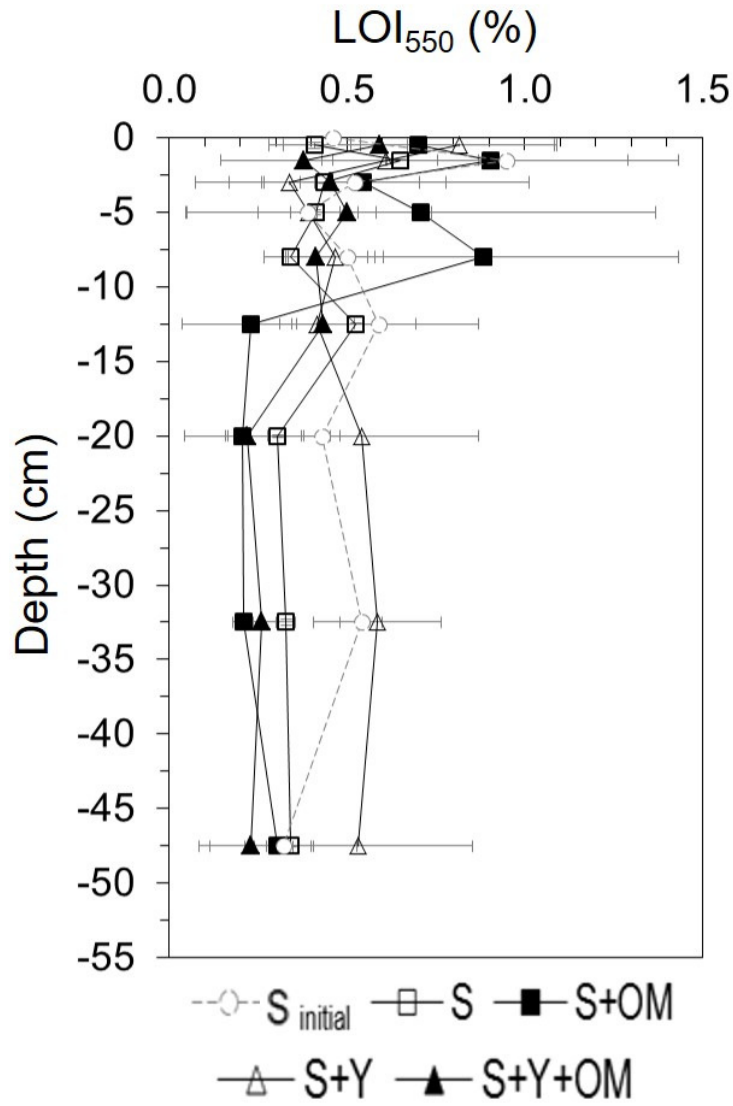

Figure S2: Profiles (mean  $\pm$  standard deviation) of sediment LOI<sub>550</sub> in each mesocosm treatment: control-sediment only (S), sediment + yabbies (S+Y), sediment + leaf litter (organic matter; S+OM) and sediment + yabbies + leaf litter (S+Y+OM) treatments, and initial sediment conditions ( $S_{initial}$ ).

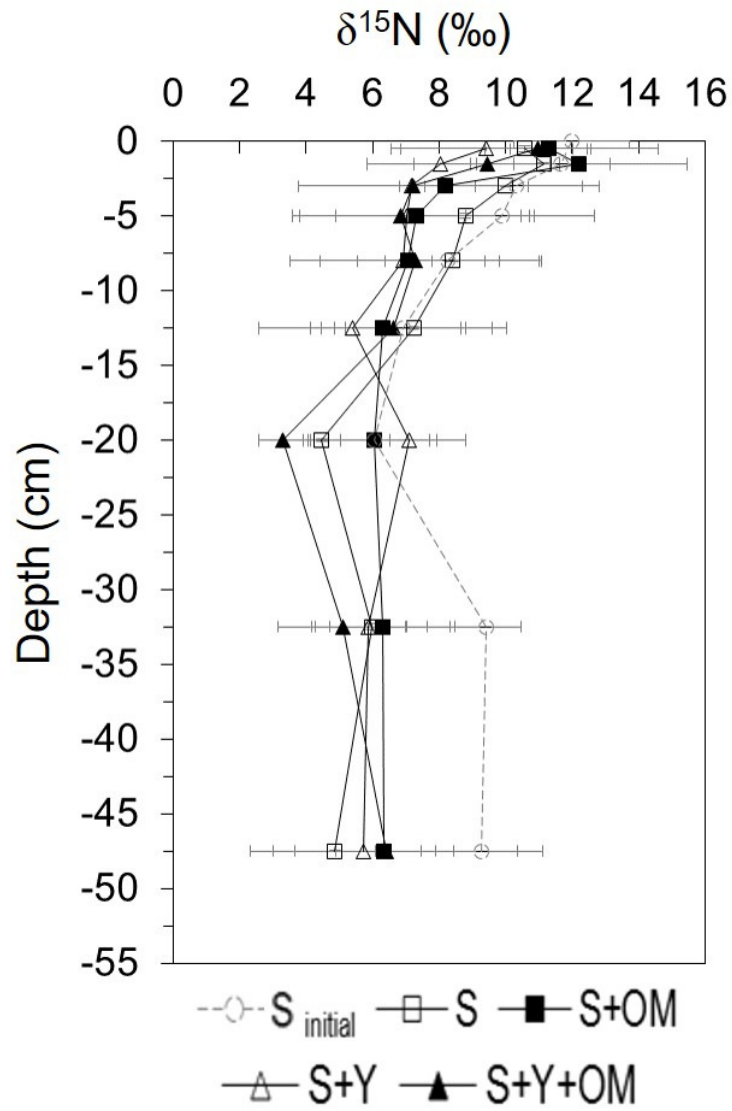

Figure S3: Profiles (mean  $\pm$  standard deviation) of sediment  $\delta^{15}\text{N}$  in each mesocosm treatment: control-sediment only (S), sediment + yabbies (S+Y), sediment + leaf litter (organic matter; S+OM) and sediment + yabbies + leaf litter (S+Y+OM) treatments, and initial sediment conditions ( $S_{\text{initial}}$ ).

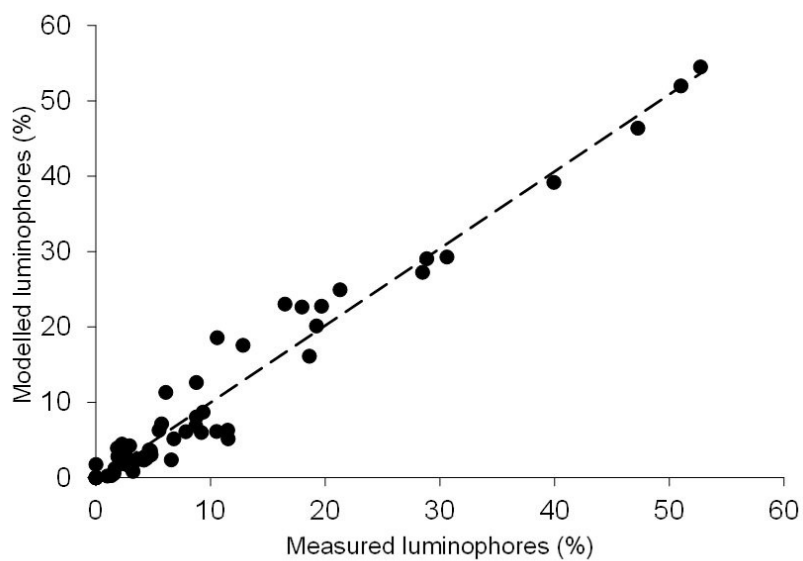

Figure S4: Modelled data (gallery-diffusion model, see Hedman et al. [38]; François et al. [40]) vs measured data. Data are percentages of retrieved luminophores in bioturbated S+Y (sediment + yabbies) and S+Y+OM (sediment + yabbies + leaf litter) sediments on day 55. Correlation coefficient  $R^2 = 0.9611$ . The dashed line represents  $y = x$ .
